# Supplementary material for: Antibiotics and the developing intestinal microbiome, metabolome and inflammatory environment: a randomized trial of preterm infants
Source: bioRxiv or medRxiv preprint supplement (doi:10.1101/2020.04.20.052142), 2020-09-03
Supplement: Supplementary file [file media-2.pdf]

**Supplemental Figure S2. Abundance of top bacterial genera correlate with abundances of inferred metabolic pathways.** Heatmap of repeated measures correlation values between counts of the 10 most highly abundant bacterial genera and abundance of inferred metabolic pathways using PICRUST2. Only bacterial genera with at least one significant correlation are depicted (p-values < 0.05). n=90 stool samples.
